# Supplementary material for: Improved electromechanical properties of brominated butyl rubber filled with modified barium titanate
Source: Royal Society of Chemistry journal article supplement (doi:10.1039/c7ra05667b), 2017-01-01
Supplement: c7ra05667b1.pdf [file c7ra05667b1.pdf]

## Supplementary Information

### **Improved electromechanical properties of brominated butyl rubber filled with modified barium titanate**

Mengnan Ruan,<sup>a,c</sup> Dan Yang,<sup>b,\*d</sup> Wenli Guo,<sup>a,b,\*c</sup> Shuo Huang,<sup>a,c</sup> Yibo Wu,<sup>b,c</sup> Hao  
Wang,<sup>b,c</sup> Huaming Wang,<sup>d</sup> and Liquan Zhang<sup>a</sup>

<sup>a</sup>College of Materials Science and Engineering, Beijing University of Chemical  
Technology, Beijing 100029, China.

<sup>b</sup>College of Materials Science and Engineering, Beijing Institute of Petrochemical  
Technology, Beijing, 102617, China

<sup>c</sup>Beijing Key Lab of Special Elastomeric Composite Materials, Beijing, 102617,  
China

<sup>d</sup>College of Mechanical and Electrical Engineering, Nanjing University of  
Aeronautics and Astronautics, Nanjing, 210016, China

E-mail: D. Yang ([yangdan@bipt.edu.cn](mailto:yangdan@bipt.edu.cn)) or W. Guo ([gwenli@bipt.edu.cn](mailto:gwenli@bipt.edu.cn))

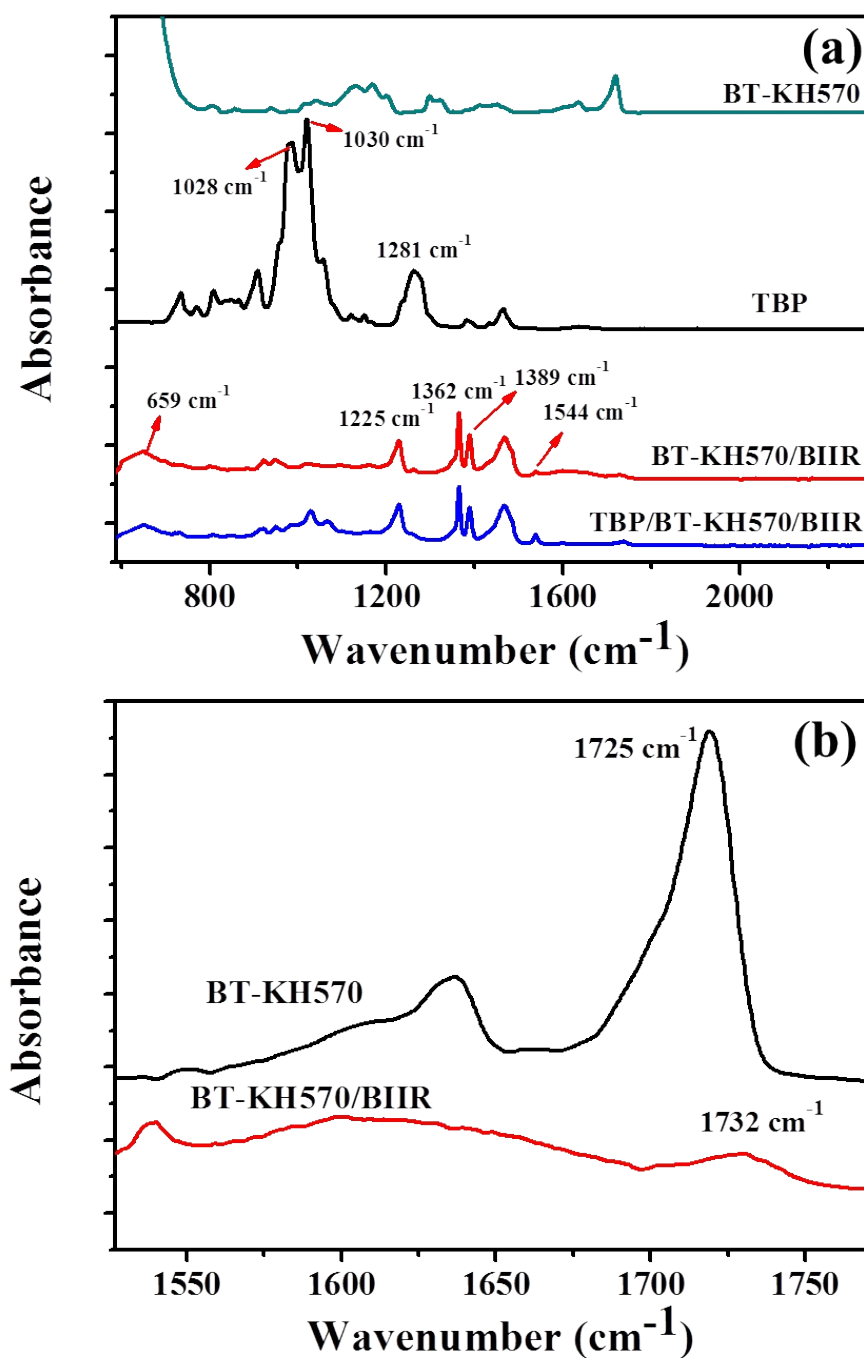

Fig.S1 FTIR spectra of (a) BT-KH570, TBP, 10 phr BT-KH570/BIIR, 30 phr TBP/(10 phr BT-KH570/BIIR) composite in the wavenumber range 584  $\text{cm}^{-1}$  to 2300  $\text{cm}^{-1}$ , (b) BT-KH570, 10 phr BT-KH570/BIIR composite in the wavenumber range 1527  $\text{cm}^{-1}$  to 1770  $\text{cm}^{-1}$ .
